# Supplementary material for: Histone modifications associated with gene expression and genome accessibility are dynamically enriched at Plasmodium falciparum regulatory sequences
Source: PubMed Central journal article supplement (PMC7682024; doi:10.1186/s13072-020-00365-5), 2020-11-23
Supplement: 13072_2020_365_MOESM8_ESM.pdf [file 13072_2020_365_MOESM8_ESM.pdf]

Top  
Medium  
Bottom  
Silent

Ring

Trophozoite

Schizont

H2A.Z

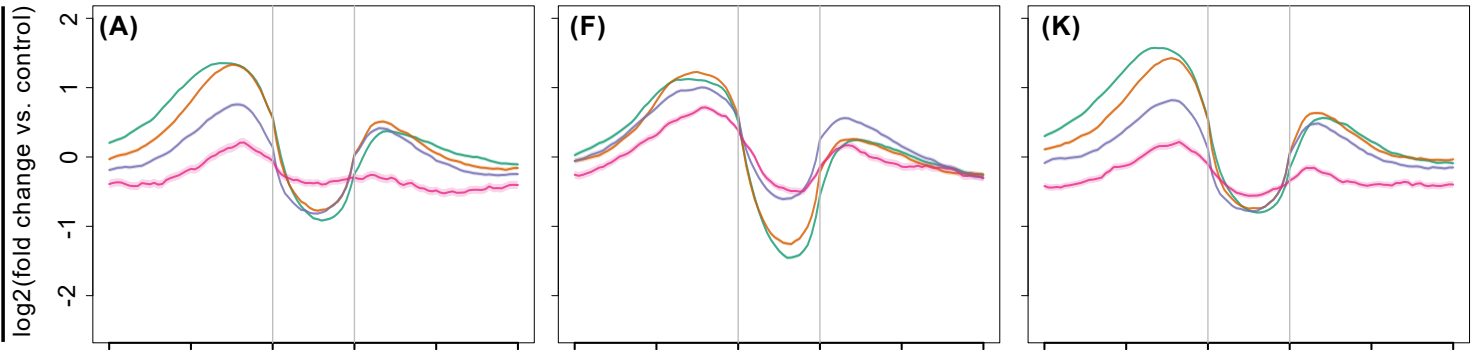

H3K18ac

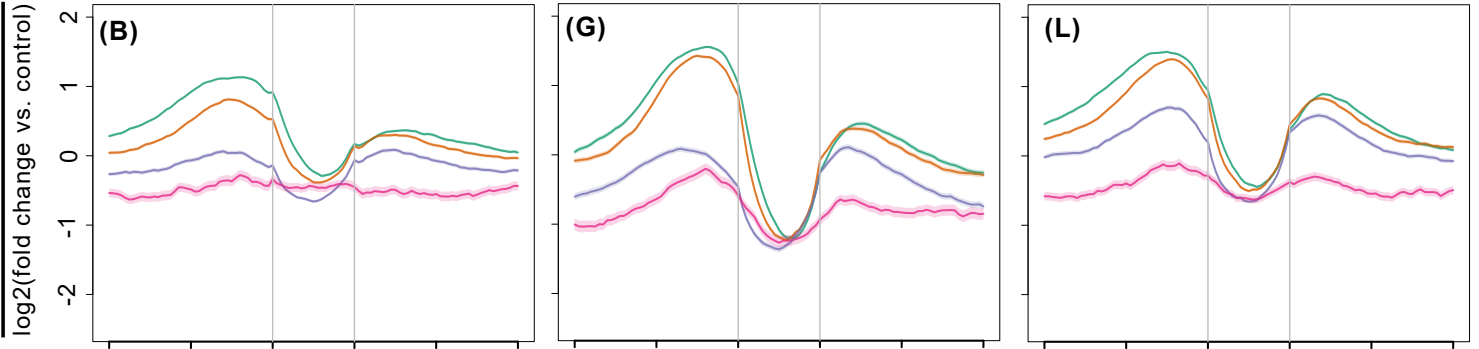

H3K27ac

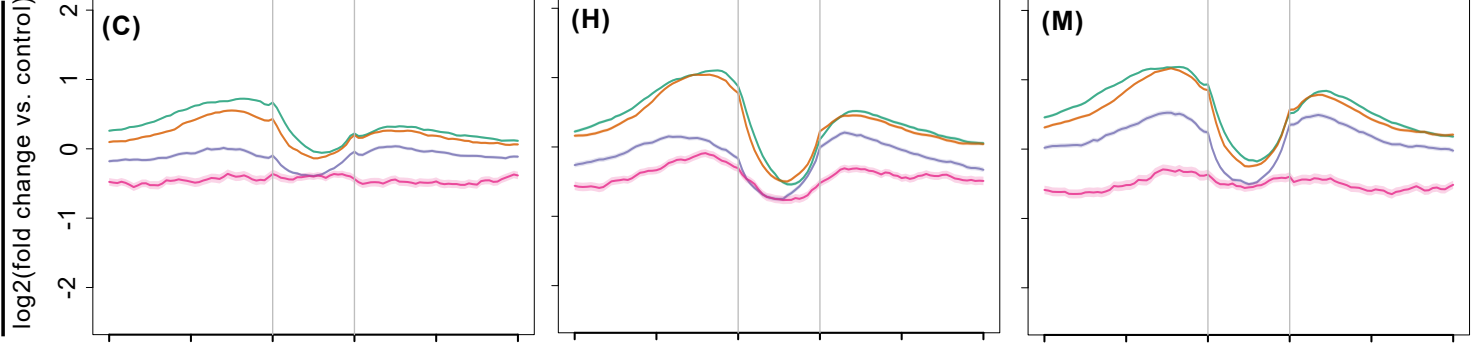

H3K4me1

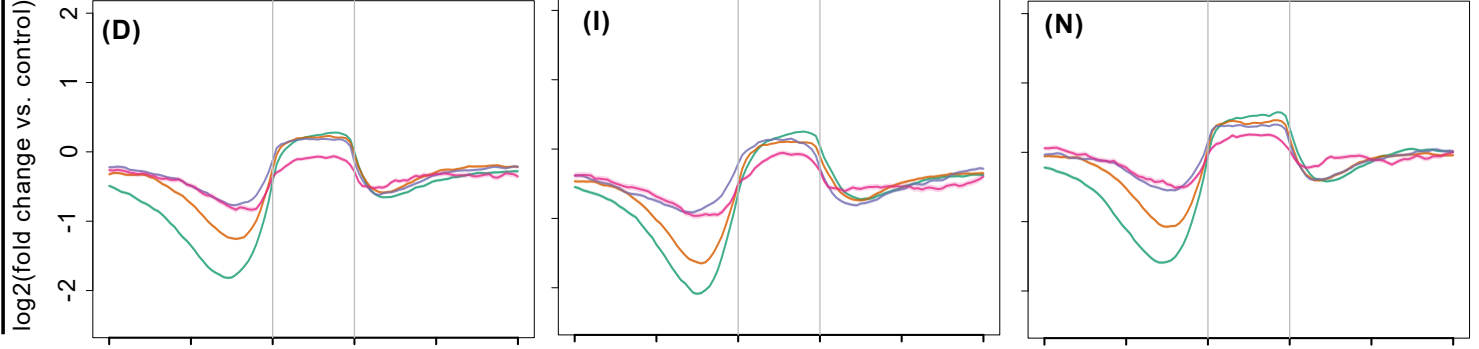

H3

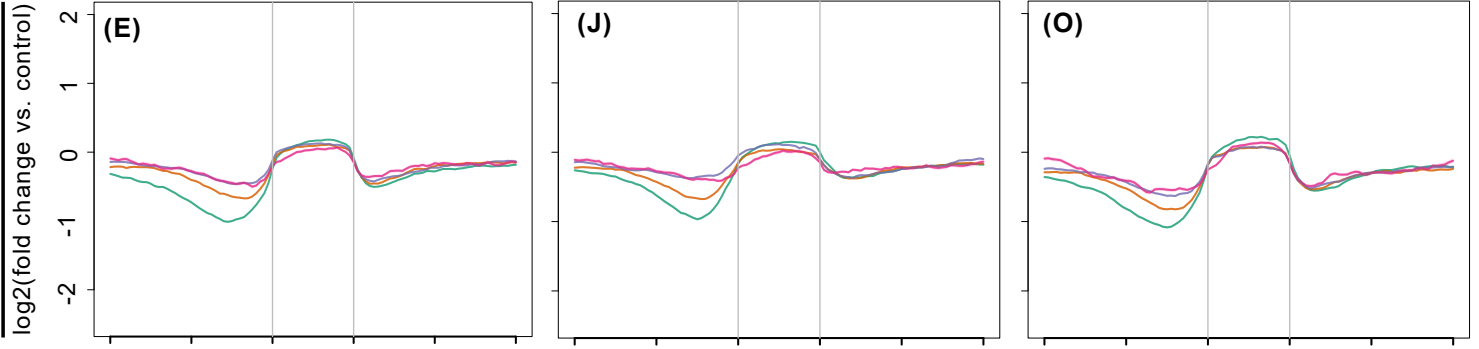

-2500 -1250 5'End 3'End 1250 2500 -2500 -1250 5'End 3'End 1250 2500 -2500 -1250 5'End 3'End 1250 2500  
Genomic Region (5' -> 3')
