# Supplementary material for: Histone modifications associated with gene expression and genome accessibility are dynamically enriched at Plasmodium falciparum regulatory sequences
Source: PubMed Central journal article supplement (PMC7682024; doi:10.1186/s13072-020-00365-5), 2020-11-23

# Additional figure S7

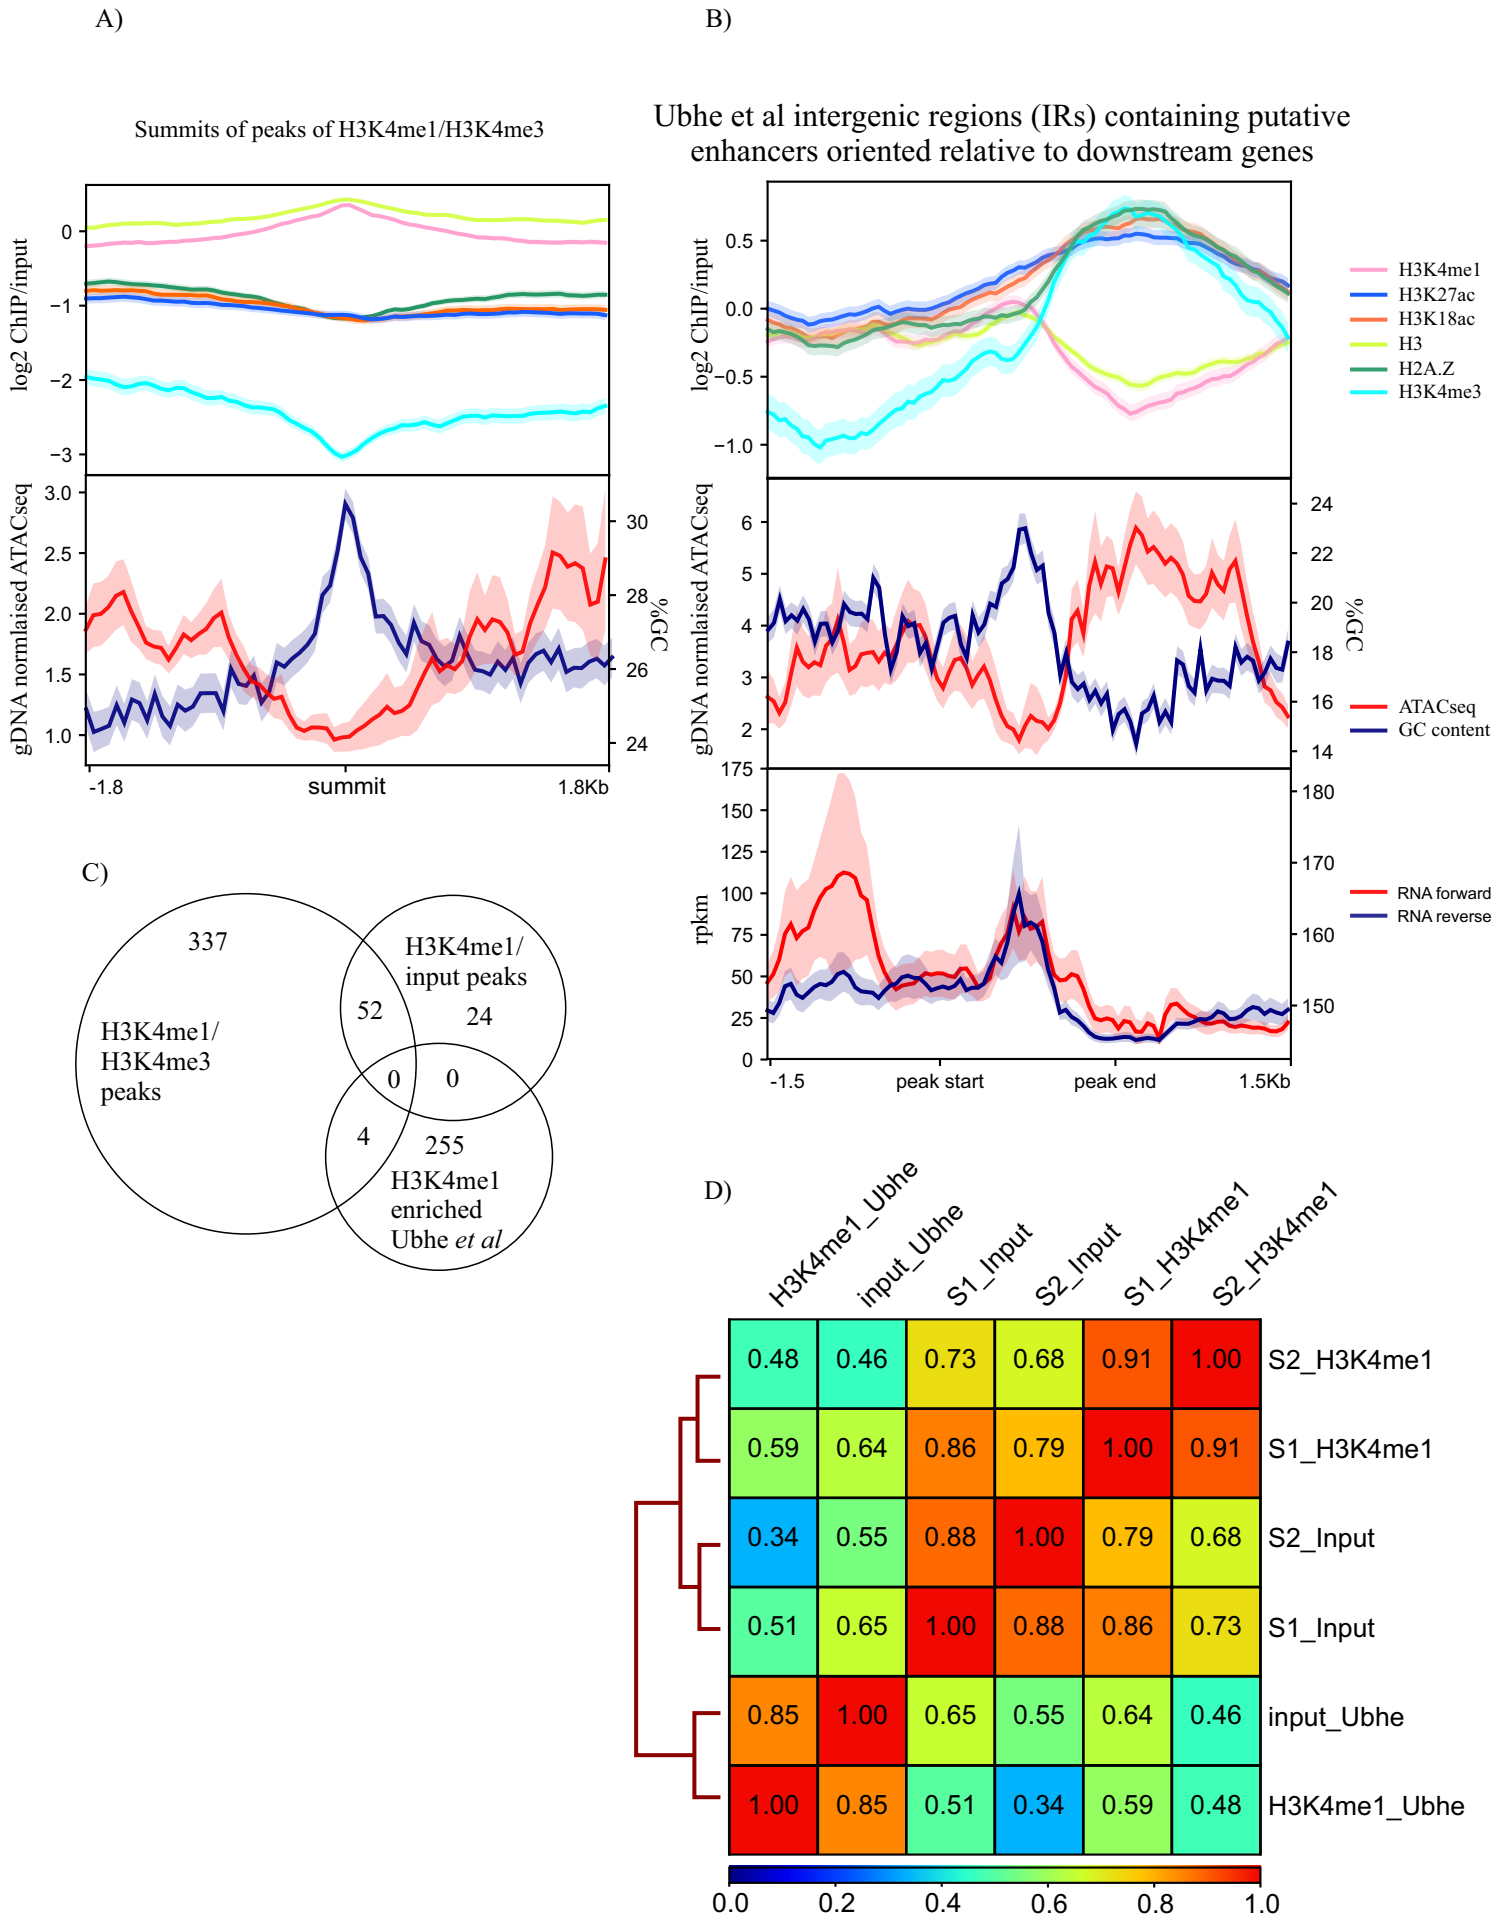

Supplement: 13072_2020_365_MOESM9_ESM.pdf [file 13072_2020_365_MOESM9_ESM.pdf]
